# Supplementary material for: Efficacy and safety of apalutamide in patients with metastatic castration-resistant prostate cancer (GENESIS): protocol for a multicentre, open-label, single-arm clinical trial
Source: HighWire-hosted journal article supplement (doi:10.1136/bmjopen-2022-070173), 2023-03-01
Supplement: bmjopen-2022-070173supp001_data_supplement.pdf [file bmjopen-2022-070173supp001_data_supplement.pdf]

1 **Table 1.** Data collection schedule

2

|                                         | Registration<br>(within<br>4<br>weeks<br>prior to<br>registra<br>tion) | Day 1 | 4<br>week<br>s | 8<br>week<br>s | 12<br>week<br>s | 24<br>week<br>s | 36<br>week<br>s | 48<br>week<br>s | Every<br>12<br>weeks<br>from 48<br>to 132<br>weeks | End of<br>protocol<br>treatment | Cancel<br>protocol<br>treatment | LPI<br>from 3<br>years<br>after<br>last<br>case<br>registra<br>tion |
|-----------------------------------------|------------------------------------------------------------------------|-------|----------------|----------------|-----------------|-----------------|-----------------|-----------------|----------------------------------------------------|---------------------------------|---------------------------------|---------------------------------------------------------------------|
| Assessment of<br>eligibility criteria   | •                                                                      |       |                |                |                 |                 |                 |                 |                                                    |                                 |                                 |                                                                     |
| Obtain consent                          | •                                                                      |       |                |                |                 |                 |                 |                 |                                                    |                                 |                                 |                                                                     |
| Registration                            | •                                                                      |       |                |                |                 |                 |                 |                 |                                                    |                                 |                                 |                                                                     |
| Patient<br>characteristics <sup>#</sup> | •                                                                      |       |                |                |                 |                 |                 |                 |                                                    |                                 |                                 |                                                                     |
| Laboratory test                         | •                                                                      |       | •              | •              | •               | •               | •               | •               | •                                                  | •                               | •                               |                                                                     |
| PSA                                     | •                                                                      |       |                | •              | •               | •               | •               | •               | •                                                  | •                               | •                               |                                                                     |
| Medication                              |                                                                        |       |                |                |                 | •               |                 |                 |                                                    |                                 |                                 |                                                                     |
| Adverse events <sup>§</sup>             |                                                                        |       |                |                |                 | •               |                 |                 |                                                    | •                               | •                               |                                                                     |
| Electrocardiogram                       | •                                                                      |       |                |                | •               | •               |                 | •               | •                                                  | •                               | •                               |                                                                     |
| CT bone<br>scintigraphy <sup>‡</sup>    | •                                                                      |       |                |                | •               | •               |                 | •               | •                                                  | •                               | •                               |                                                                     |

|                                                  |  |   |  |  |   |   |   |   |   |   |   |   |
|--------------------------------------------------|--|---|--|--|---|---|---|---|---|---|---|---|
| Confirmation of disease progression              |  |   |  |  | • | • | • | • | • | • | • |   |
| Simultaneous survival check                      |  |   |  |  |   |   |   |   |   |   |   | • |
| Prohibited concomitant medications and therapies |  | • |  |  |   |   |   |   |   | • |   |   |

3 #Sex, date of birth, age, medical history, comorbidity, primary disease, TNM classification, number of days after surgery, details of  
4 adjuvant therapy.

5 §Grade 3 or 4 (according to Common Terminology Criteria for Adverse Events version 4.0).

6 ‡Magnetic resonance imaging may be used instead of CT, with or without contrast media, but each patient should be assessed and  
7 judged using one method only.

8 CT, computed tomography; LPI, last patient in; PSA, prostate-specific antigen
