# Supplementary material for: Efficacy and safety of apalutamide in patients with metastatic castration-resistant prostate cancer (GENESIS): protocol for a multicentre, open-label, single-arm clinical trial
Source: HighWire-hosted journal article supplement (doi:10.1136/bmjopen-2022-070173), 2023-03-01
Supplement: bmjopen-2022-070173supp002_data_supplement.pdf [file bmjopen-2022-070173supp002_data_supplement.pdf]

説明同意文書：転移性去勢抵抗性前立腺癌に対するアパルタミドの有効性・安全性の評価を目的とした多施設共同単群試験（GENESIS Study）  
作成年月日：2022年6月15日 版数：1.2版

説明同意文書  
転移性去勢抵抗性前立腺癌に対する  
アパルタミドの有効性・安全性の評価を  
目的とした多施設共同単群試験

研究代表医師： 中野 雄造

所属： 神戸大学医学部附属病院 泌尿器科

職名： 准教授

作成年月日：2022年6月15日

版数：1.2版

説明同意文書：転移性去勢抵抗性前立腺癌に対するアパルタミドの有効性・安全性の評価を目的とした多施設共同単群試験（GENESIS Study）

作成年月日：2022年6月15日 版数：1.2版

## 1. はじめに

この説明文書は、転移性去勢抵抗性前立腺癌の患者さんに対して実施している臨床研究について記載されています。臨床研究とは、患者さんに参加・協力していただいて治療法や診断方法に関して有効性や安全性を調べる研究のことをいいます。臨床研究は、通常の診療では実施しない手順や検査項目なども含まれており、研究的な側面があります。現在標準的に実施されている治療法も、過去のいくつかの臨床研究の結果から導かれたものであり、より良い治療や医療にとって臨床研究は不可欠なものです。

これから担当医師があなたに今回の臨床研究について説明し、この説明文書をお渡しします。その内容をよく理解していただき、納得していただいたうえで、この臨床研究へ参加するかどうか自由にお決めください。臨床研究についてわからないことがあれば、いつでも担当医師にご質問、ご相談ください。

## 2. 臨床研究の実施について

この臨床研究は、参加される方々の人権や安全を守るために国が定めた『臨床研究法』を遵守して実施します。この臨床研究は、認定臨床研究審査委員会（医学の専門家、法律の専門家や一般の人などで構成される委員会）において、臨床研究に参加される方の権利が守られ、倫理的および科学的に審査され承認されています。その後に各実施医療機関の管理者の承認を得たうえで実施されます。

研究開始後も、認定臨床研究審査委員会において人権に配慮されているか、安全に実施できているか、臨床研究法を遵守して研究が実施されているか、などを継続的に審査します。

以下に、認定臨床研究審査委員会の情報を記載します。また、ホームページ上で情報公開しておりますのでご参照ください。

- 名称：神戸大学臨床研究審査委員会  
(Kobe University Clinical Research Ethical Committee)
- 認定番号：CRB5180009
- 住所：兵庫県神戸市中央区楠町 7-5-2
- ホームページアドレス：<http://www.hosp.kobe-u.ac.jp/ctrc/cerb/>

認定臨床研究審査委員会についての苦情及び問い合わせ窓口は、『23. 臨床研究の問い合わせ窓口』をご覧ください。

また、この臨床研究を実施するに当たり、実施計画を厚生労働大臣に提出しています。研究計画の概要と進捗状況については厚生労働省が整備する臨床研究等提出・公開システム jRCT (Japan Registry of Clinical Trials) に登録し公開しています。この臨床研究の結果についても研究終了後に jRCT 上に公表する予定です。

- jRCT のホームページアドレス：<https://jrct.niph.go.jp/>

説明同意文書：転移性去勢抵抗性前立腺癌に対するアパルタミドの有効性・安全性の評価を目的とした多施設共同単群試験（GENESIS Study）

作成年月日：2022年6月15日 版数：1.2版

### 3. 臨床研究への参加について

#### ● 自由意思による臨床研究への参加、不参加

この臨床研究では、研究への参加をお願いする患者さんご本人からの同意が必要です。担当者がこの説明文書を用いて研究について説明を行います。これから説明する臨床研究について十分に理解した上で、参加しても良いと思われた場合には、この説明文書の最後にある同意書にご署名と日付のご記入をお願いします。この臨床研究に参加するかどうかはあなたの自由ですので、信頼できる人と相談するなどしていただき、最終的には、ご自身の意思で決めてください。また不安なことや不明なことがありましたら、担当医師にいつでもご相談ください。この臨床研究に参加されない場合も、従来の治療を受けることができ、その後の治療において何ら不利益や不都合が生じることはありません。

#### ● 臨床研究参加中の同意撤回

この臨床研究に参加した後に参加を取りやめたいと思われた場合は、理由がなくても、いつでも参加を取りやめることができます。参加の同意を取りやめたい場合には、担当医師にお伝えください。臨床研究への参加を途中で取りやめた場合でも、従来の治療を受けることができ、その後の治療において何ら不都合や不利益が生じることはありません。ただし、同意撤回より前に採取した血液などの検体、データや情報は臨床研究の評価のために使用させていただきます。使用を望まない場合には、これらの検体やデータ等の使用を拒否することができますので、申し出てください。

ただし、同意を取り消された時点で、すでに研究成果が論文などで公表されていた場合には、結果を破棄できない場合もありますので、ご了承ください。

### 4. この臨床研究の対象となる患者さんの病状と治療について

あなたの病気は転移性去勢抵抗性前立腺癌です。

前立腺癌は、男性ホルモンによって進行、増殖することが知られています。そのため、ホルモン療法により男性ホルモンの分泌や働きを抑えることで、前立腺癌の進行を抑制する治療が行われます。しかし、前立腺癌に対するホルモン療法の効果は持続しない場合があります。効果がなくなると、男性ホルモンが低く抑えられているにもかかわらず、前立腺癌が再び進行、増殖することがあります。このような状態の前立腺癌を「去勢抵抗性前立腺癌」と呼びます。また、あなたの前立腺癌は他の臓器に転移していることが確認されています。

本試験薬である、「アパルタミド」は、アーリーダ®という商品名にて、2019年に「遠隔転移を有しない去勢抵抗性前立腺癌」および2020年に「遠隔転移を有する前立腺癌」の適応症にて承認され、実際の治療に使用されています。あなたの病気の「転移性去勢抵抗性前立腺癌」にはその使用報告がありません。

説明同意文書：転移性去勢抵抗性前立腺癌に対するアパルタミドの有効性・安全性の評価を目的とした多施設共同単群試験（GENESIS Study）

作成年月日：2022年6月15日 版数：1.2版

## 5. この臨床研究の意義と目的

### ● 目的

この臨床研究の目的は、転移性去勢抵抗性前立腺癌患者に対してアパルタミドの抗腫瘍効果および安全性を総合的に検討することです。

### ● 意義

転移性去勢抵抗性前立腺癌に対するアパルタミドの臨床研究はほとんど行われておらず、情報が少ないのが実情です。そこで、転移性去勢抵抗性前立腺癌に対するアパルタミドの有益な情報を得ることは臨床的に意義があると考え、この臨床研究を計画しました。

## 6. この臨床研究の方法（治療内容）について

### ● 参加基準

主な基準は以下となりますが、その他にもいくつかの基準があり、担当医師によりこの臨床研究に参加することが適切と判断された患者さんが対象となります。そのため、あなたが参加を希望されても、参加できないことがありますのでご了承ください。

#### 1) 参加できる基準（以下の基準を全て満たす場合に参加できます）

- 前立腺癌の組織を調べたら、腺癌という種類が優位な前立腺癌であることが確認された方
- 前立腺癌が他の臓器に転移した方
- 前立腺癌が去勢抵抗性になる前に、ホルモン療法を受けたことがある方
- 同意を取得した時の年齢が満20歳以上の方

#### 2) 参加できない基準（以下の基準に1つでも当てはまる場合は参加できません）

- 前立腺癌以外の悪性腫瘍の既往があり、根治していないと判断される方
- 他の重篤な急性あるいは慢性疾患に罹患している方
- その他、担当医師が研究への参加を不適格と判断した方

あなたは上記の参加基準を満たすと考えられるため、この研究について説明をさせていただきます。参加に同意してくださった後に、改めて検査を行って、研究参加の可否を判断いたします。

### ● 試験薬について

#### 1) 試験薬について

この臨床研究では、市販されている、商品名アーリーダ®（一般名：アパルタミド）錠60mgを試験薬として使用します。

説明同意文書：転移性去勢抵抗性前立腺癌に対するアパルタミドの有効性・安全性の評価を目的とした多施設共同単群試験（GENESIS Study）

作成年月日：2022年6月15日 版数：1.2版

アパルタミドは、前立腺細胞のアンドロゲン（男性ホルモン）の受容体に対するアンドロゲンの結合を阻害し、抗腫瘍作用を示します。

アパルタミドは、「遠隔転移を有しない去勢抵抗性前立腺癌」および「遠隔転移を有する前立腺癌」を適応症として承認されています。また、承認されている用法・用量は、「通常、成人にはアパルタミドとして1日1回240 mgを経口投与する。なお、患者の状態により適宜減量する。」となっています。あなたの病気の「転移性去勢抵抗性前立腺癌」は、「転移を有する前立腺癌」ですので、今回の臨床研究では、適応外の使用にはなりません。

## 2) 試験薬の服用方法

今回、あなたには、アパルタミドをこの承認された用法・用量と同じ方法で服用していただきます。すなわち、試験薬を1日1回、1回4錠を毎日服用します。服用期間は、臨床研究の開始日から144週間で、その間毎日服用していただきます。

副作用（11ページ「試験薬アパルタミドの副作用について」参照）によって、1回に服用する量が変わること（休薬または減量）があります。また、副作用が回復した後投与を再開することがあります。担当医師の指示を必ず守って服用してください。

試験薬を服用する時刻・タイミングは問いませんが、毎日ほぼ同じ時刻・タイミングで服用ください。

試験薬の服用を忘れ、12時間以内に思い出した場合にのみ、1回分の用量を服用してください。12時間を経過してしまった場合は、次の日に通常の1日分の用量を服用してください。2日分の用量は絶対に服用しないでください。

## 7. スケジュールと実施事項について

### ● スケジュールについて

あなたが臨床研究に参加することに同意されたら、あなたの症状について調査します。その後、参加基準を満たしていた場合、臨床研究に参加する患者さんとして登録します。この臨床研究に参加された場合は、試験薬を144週間（約3年）、服用してください。試験薬の服用を開始したら、開始4週後、8週後、12週後、12週後以降は12週間ごとに受診して、気になる点がないかを教えてください。受診していただいたときに、薬が飲めているか、飲み忘れの薬を持っていないか、副作用がないかをお伺いするとともに、前立腺特異抗原（PSA）検査および画像検査を行い、病状がどうなっているか、また、血液検査を行い、副作用が起きていないかを確認します。

説明同意文書：転移性去勢抵抗性前立腺癌に対するアバルタミドの有効性・安全性の評価を目的とした多施設共同単群試験（GENESIS Study）

作成年月日：2022年6月15日 版数：1.2版

詳細は7ページ「試験薬による治療・2次治療スケジュール表」をご覧ください。  
スケジュールに記載されている検査等のうち、同意をいただく前に実施した結果を使用できるものは、その結果を使用します。

あなたが、試験薬投与を中止した場合は、その後の2次治療（前立腺癌に対する薬物治療）に関する調査を行います。2次治療の観察期間は症例登録から最大3年です。試験薬投与が中止し、2次治療が開始した後も、試験期間開始日を0日として、引き続き7ページの「試験薬による治療・2次治療スケジュール表」に従って、問診・検査等の調査を行います。



説明同意文書：転移性去勢抵抗性前立腺癌に対するアバルタミドの有効性・安全性の評価を目的とした多施設共同単群試験（GENESIS Study）

作成年月日：2022年6月15日 版数：1.2版

## ＜＜試験薬による治療・2次治療スケジュール表＞＞

|                      | スクリーニング時           | 登録時    | 試験薬による治療・2次治療 |        |        |                 |                 |        |                 |                     | 試験薬による治療・2次治療終了時（144週） | 試験薬による治療・2次治療中止時 <sup>*6</sup> | 最終症例治療開始から3年後 |
|----------------------|--------------------|--------|---------------|--------|--------|-----------------|-----------------|--------|-----------------|---------------------|------------------------|--------------------------------|---------------|
|                      |                    |        | 0週            | 4週     | 8週     | 12週             | 24週             | 36週    | 48週             | 48週以降、132週まで        |                        |                                |               |
| 来院番号                 | Visit0             |        | Visit1        | Visit2 | Visit3 | Visit4          | Visit5          | Visit6 | Visit7          | Visit8~14           | Visit15                |                                |               |
| 来院日（日）               | 28日前 <sup>*1</sup> | 28日前~0 | 0             | 28±14  | 56±14  | 84±14           | 168±28          | 252±28 | 336±28          | ±28                 | 1008±28                |                                |               |
| 同意取得                 | ○                  |        |               |        |        |                 |                 |        |                 |                     |                        |                                |               |
| 登録                   |                    | ○      |               |        |        |                 |                 |        |                 |                     |                        |                                |               |
| 患者背景 <sup>*2</sup>   | ○                  |        |               |        |        |                 |                 |        |                 |                     |                        |                                |               |
| 現病歴                  | ○                  |        |               |        |        |                 |                 |        |                 |                     |                        |                                |               |
| 血液検査 <sup>*3</sup>   | ○                  |        |               | ●      | ●      | ●               | ●               | ●      | ●               | 12週間毎 <sup>*7</sup> | ●                      | ●                              |               |
| 前立腺特異抗原 (PSA)        | ○                  |        |               |        |        | ○               | ○               | ○      | ○               | 12週間毎               | ○                      | ○                              |               |
| 試験薬投与                |                    |        | 連日（1日1回投与）    |        |        |                 |                 |        |                 |                     |                        |                                |               |
| 体調等の確認 <sup>*4</sup> |                    |        |               |        |        | ●               |                 |        |                 |                     | ●                      | ●                              |               |
| 12誘導心電図検査            | ○                  |        |               |        |        | ●               | ●               |        | ●               | 24週間毎 <sup>*7</sup> | ●                      | ●                              |               |
| 画像検査 <sup>*5</sup>   | ○                  |        |               |        |        | ○ <sup>*8</sup> | ○ <sup>*8</sup> |        | ○ <sup>*8</sup> | 24週間毎 <sup>*8</sup> | ○ <sup>*8</sup>        | ○ <sup>*8</sup>                |               |
| 病勢進行の有無              |                    |        |               |        |        | ○               | ○               | ○      | ○               | 12週間毎               | ○                      | ○                              |               |
| 転帰調査 <sup>*6</sup>   |                    |        |               |        |        | ○               | ○               | ○      | ○               | 12週間毎               | ○                      | ○                              | ○             |
| 併用薬・併用療法             |                    |        |               |        |        | ●               |                 |        |                 |                     | ●                      | ●                              |               |

※1 あなたの同意が得られた場合は、同意取得前の検査結果を用いることもありますが、検査は登録前2か月以内のものに限りま。

※2 患者背景として生年月、年齢（同意取得時）、合併症（併存症）、日常での活動状況を確認します。

※3 血液検査として、ヘモグロビン、白血球数、好中球数、リンパ球数、血小板数、総蛋白、アルブミン、総ビリルビン、AST、ALT、ALP、LDH、血清クレアチニン、CRP、血清Na、血清Caを測定します。これらは試験の安全性を確認するために行います。1回あたりの採血量は20.8 mL（うちPSA測定分が1.8 mL）です。

※4 副作用と思われる症状などこの臨床研究に参加して以降に、生じたまたは悪化した体調変化の有無や程度について診察時にお伺いします。副作用と思われる症状などは消失するか、これ以上の回復が見込めない状態になるか、または試験薬投与終了後30日まで調査します。

※5 CT（コンピュータ断層撮影）は、原則として造影CTとしますが、担当医師の判断によりMRIまたは造影剤を使用しない撮影になる場合があります。骨シンチグラフィ

説明同意文書：転移性去勢抵抗性前立腺癌に対するアバルタミドの有効性・安全性の評価を目的とした多施設共同単群試験（GENESIS Study）

作成年月日：2022年6月15日 版数：1.2版

検査も実施します。

- ※ 6 転帰調査として病状の確認、もしくは試験薬投与を中止した場合は、その後の2次治療に関する調査を行います。
- ※ 7 2次治療へ移行後は実施不要
- ※ 8 2次治療へ移行後は研究対象者の状態を考慮し、必要に応じて実施する。
- 試験薬による治療・2次治療を通して実施要
- 2次治療へ移行後は実施不要



説明同意文書：転移性去勢抵抗性前立腺癌に対するアパルタミドの有効性・安全性の評価を目的とした多施設共同単群試験（GENESIS Study）

作成年月日：2022年6月15日 版数：1.2版

## ● 実施事項について

臨床研究で実施する事項について以下で詳しく説明します。

- 患者背景、現病歴  
スクリーニング期間（試験薬治療開始 28 日以内）にお伺いします。  
患者背景の項目は以下のとおりです。  
生年月、年齢（同意取得時）、合併症(併存症)、日常での活動状況
- 血液検査  
試験薬の安全性を確認するために、スクリーニング期間、試験治療開始 4 週後、8 週後、12 週後および 12 週後以降 144 週までは 12 週ごとに行います。  
血液検査の項目は以下のとおりです。  
ヘモグロビン、白血球数、好中球数、リンパ球数、血小板数、総蛋白、アルブミン、総ビリルビン、AST、ALT、ALP、LDH、血清クレアチニン、CRP、血清 Na、血清 Ca
- 前立腺特異抗原（PSA）  
PSA は、血液中にある前立腺に特異的なたんぱく質の一種で、前立腺癌になると数値が高くなります。そのため、癌の進行度の推定、治療効果の判定、再発の診断ならびに予後の予測にも役立ちます。  
試験薬の有効性を確認するために、スクリーニング期間、試験治療開始 12 週後および 12 週後以降 144 週までは 12 週ごとに行います。
- 体調等  
副作用と思われる症状などこの臨床研究に参加して以降に、生じたまたは悪化した体調変化の有無や程度について診察時にお伺いします。  
副作用と思われる症状などは試験薬投与終了後 30 日まで調査します。  
なお、体調等で気になることがありましたら、『23. 臨床研究の問い合わせ窓口』に記載されている、この臨床研究の各実施医療機関（あなたの受診されている病院）までお問い合わせください。
- 12 誘導心電図検査  
試験薬には副作用として心臓障害がおこる可能性があります。その心臓障害の有無や程度を確認するために、スクリーニング期間、試験治療開始 12 週後、24 週後、48 週後および 48 週後以降 144 週までは 24 週ごとに測定します。
- 画像検査（造影 CT および骨シンチグラフィ）  
試験薬の抗腫瘍効果および病勢進行を確認するために、スクリーニング期間、試

説明同意文書：転移性去勢抵抗性前立腺癌に対するアパルタミドの有効性・安全性の評価を目的とした多施設共同単群試験（GENESIS Study）

作成年月日：2022年6月15日 版数：1.2版

試験治療開始 12 週後、24 週後、48 週後および 48 週後以降 144 週までは 24 週ごとに測定します。

なお、CT で撮影する箇所は胸腹部です。また、CT に関しては、造影 CT が望ましいですが、担当医師の判断により、MRI または造影剤を使用しない撮影になる場合があります。

➤ 病勢進行の確認

PSA、造影 CT および骨シンチグラフィーの結果から、試験治療開始 12 週後および 12 週後以降 144 週までは 12 週ごとに行います。

➤ 転帰調査

病状の確認調査、もしくは試験薬の投与を中止した場合には、その後の 2 次治療に関する調査を行います。

➤ 2 次治療の調査

試験薬投与が中止し、2 次治療が開始した後も、試験期間開始日を 0 日として、引き続き 7 ページの「試験薬による治療・2 次治療スケジュール表」に従って、問診・検査等の調査を行います。

● **臨床研究の期間について**

この臨床研究は、2022 年 8 月 1 日から 2028 年 7 月 31 日にかけて実施します。あなたがこの臨床研究に参加された場合の予定参加期間は、治療開始まで（スクリーニング期間）4 週間、試験治療期間 144 週間（約 3 年間）、また、この臨床研究に最後に登録された患者から約 3 年後に最終の転帰調査を行います。

**8. この臨床研究の実施医療機関と参加予定者数**

この臨床研究は全国の医療機関で実施されます。実施医療機関の一覧を別紙に示します。また合計で約 110 人の患者さんに参加していただく予定です。

**9. 臨床研究終了後の対応について**

臨床研究が終了した後は、あなたの症状に合わせて適切な薬剤を選択し、最も良いと思われる治療を行います。

**10. 期待される利益と予想される不利益について**

● **利益：効果について**

この臨床研究に参加することによって、直接あなたに利益が生じることはありませんが、この臨床研究の成果によっては、今後アパルタミド治療の効果あるいは予

説明同意文書：転移性去勢抵抗性前立腺癌に対するアパルタミドの有効性・安全性の評価を目的とした多施設共同単群試験（GENESIS Study）

作成年月日：2022年6月15日 版数：1.2版

後を、より予測できる可能性が期待できます。

### ● 不利益：

この臨床研究に参加することによって、通院や検査の時期が通常の診療よりも細かく規定され不便を感じることもあるかもしれません。また、通院回数が増え（特に、治療開始12週後までは1回/月）、検査のための採血量が1回あたり20.8 mL（そのうちPSA測定分が1.8 mL）多くなります。

造影CT検査、骨シンチグラフィ検査を行う際には、それぞれ造影剤、放射性医薬品を静脈に注射します。造影剤、放射性医薬品による副作用が起こることもあります。

### 予想される副作用と危険性について

本試験薬の販売承認時に、規制当局は、安全性検討事項の重要な特定されたりスクとして、痙攣発作、重度の皮膚障害、虚血性心疾患、間質性肺疾患、重要な潜在的リスクとして、心臓障害（虚血性心疾患を除く）、骨折を設定しました。

あなたには、以下のような副作用が起こる可能性があります。臨床研究に参加後、気になる症状がありましたら、遠慮なくご相談ください。試験薬による副作用が生じた場合には、適切な診療をおこない、誠実に対応いたします。また、副作用の程度や種類によっては、担当医師が服用を中止することがあります。

### 試験薬アパルタミドの副作用について

国内外で報告された副作用は以下のとおりです。

#### 1) 重大な副作用

特にご注意ください重大な副作用と、それぞれの主な自覚症状を記載しました。副作用であれば、それぞれの重大な副作用ごとに記載した主な自覚症状のうち、いくつかの症状が同じような時期にあらわれることが一般的です。

このような場合には、ただちに担当医師にご連絡ください。

| 重大な副作用                                             | 主な自覚症状                                                                                     |
|----------------------------------------------------|--------------------------------------------------------------------------------------------|
| 痙攣発作（0.2%）                                         | 顔や手足の筋肉がぴくつく、一時的にボーっとする、意識の低下、手足の筋肉が硬直しガクガクと震える                                            |
| 心臓障害<br>狭心症（0.2%）、心筋梗塞（0.2%）、心房細動（0.2%）、心不全（0.3%）等 | 動悸、胸の不快感、めまい、脈がとぶ、息苦しい、息切れ、疲れやすい、むくみ、体重の増加、しめ付けられるような胸の痛み、冷汗が出る、胸を強く押さえつけられた感じ、あごの痛み、左腕の痛み |
| 重度の皮膚障害<br>中毒表皮壊死融解症（頻度不明）、多形紅斑（0.3%）等             | 皮膚が広い範囲で赤くなり、破れやすい水ぶくれが多発、発熱、全身の発赤、皮膚・粘膜のただれ、水ぶくれ、円形の斑の辺縁部にむくみによる環状の隆起を伴ったものが多発する、関節や喉の痛み  |

説明同意文書：転移性去勢抵抗性前立腺癌に対するアバルタミドの有効性・安全性の評価を目的とした多施設共同単群試験（GENESIS Study）

作成年月日：2022年6月15日 版数：1.2版

|              |               |
|--------------|---------------|
| 間質性肺疾患（頻度不明） | 咳、息切れ、息苦しい、発熱 |
|--------------|---------------|

## 2) その他の副作用

重大な副作用以外の副作用を記載しました。これらのうち、骨折を疑うようなことがございましたら、ただちに担当医師にご連絡ください。

|                  | 5%以上           | 5%未満                  |
|------------------|----------------|-----------------------|
| 内分泌障害            |                | 甲状腺機能低下症              |
| 代謝及び栄養障害         | 食欲減退           | 高コレステロール血症、高トリグリセリド血症 |
| 皮膚及び皮下組織障害       | 皮疹（18.2%）、そう痒症 | 脱毛症                   |
| 神経系障害            |                | 味覚異常                  |
| 血管障害             | ほてり            | 高血圧                   |
| 胃腸障害             | 悪心、下痢          | 関節痛、筋痙縮               |
| 筋骨格系及び結合組織障害     |                | 関節痛、筋痙縮               |
| 一般・全身障害及び投与部位の状態 | 疲労（18.8%）      | 無力症、体重減少              |
| 傷害、中毒及び処置合併症     |                | 転倒、骨折                 |

## 11. この臨床研究中に、あなたの健康に被害が生じた場合について

この臨床研究は、これまでの報告に基づいて科学的に計画され慎重に行われますが、もし臨床研究の期間中あるいは終了時あなたに今までなかった症状が現れたときは、すぐに担当医師に連絡し、治療方法などをご相談ください。[連絡先については23.臨床研究の問い合わせ窓口をご参照ください。](#)

万一、この臨床研究によりあなたが何らかの健康被害を被った場合は、適切な治療および補償が受けられます。この臨床研究は臨床研究等保険に加入しており、この臨床研究に伴い重度の健康被害が発生した場合は、臨床研究等保険に該当する範囲内で補償を受けることができます。ただし、その健康被害がこの臨床研究と全く関係ない他の原因などで起こった場合、または健康被害が起きたのは、あなたが担当医師の指示に従わなかったためである場合（例「22.あなたに守っていただきたいこと」を守らなかった場合）など、あなた自身の責任（故意または重大な過失）である場合は、補償が受けられなかったり、補償が減額されたりすることがあります。

なお、この臨床研究は医薬品の性質上、「医薬品副作用被害救済制度」の対象とはなりません。

## 12. この臨床研究に関する新たな情報が得られた場合について

あなたがこの臨床研究に参加されている間に、副作用などの新しい情報が得られることがあります。臨床研究を続けるかどうかあなたの意思に影響する新しい情報が明らかになった場合は、あなたに口頭や説明同意文書でお伝えし、担当医師は臨床研究に

説明同意文書：転移性去勢抵抗性前立腺癌に対するアパルタミドの有効性・安全性の評価を目的とした多施設共同単群試験（GENESIS Study）

作成年月日：2022年6月15日 版数：1.2版

継続して参加されるかどうか、あなたの意思を再度、確認します。

### 13. 他の治療法について

あなたがこの臨床研究に参加されない場合には、従来の治療が行なわれます。あなたの病気には以下のようなお薬が使用できますので、担当医師とよくご相談してください。この臨床研究で使用する試験薬と、従来の薬を比較した場合の利点・欠点について記載していますので、ご参照ください。また、この臨床研究に参加されない場合でも、市販のアパルタミドを使用することができます。その場合も、あなたに不利益や不都合を生じることはありません。

| 選択できる治療法     | 利点                      | 欠点                                                           |
|--------------|-------------------------|--------------------------------------------------------------|
| ドセタキセル       | 費用が安い                   | 3週間ごとに来院して1時間以上かけて点滴静注する。重大な副作用や副作用の頻度が高い                    |
| エンザルタミド      | 皮膚及び皮下組織障害による副作用の頻度が少ない | 重大な副作用として血小板減少が報告されている                                       |
| アピラテロン酢酸エステル | 皮膚及び皮下組織障害による副作用の頻度が少ない | 経ロステロイド剤であるプレドニゾロンを併用する重大な副作用として、肝機能障害、低カリウム血症、血小板減少が報告されている |

### 14. 臨床研究の中止について

あなたが臨床研究の治療の継続を希望しても、以下の理由などにより担当医師があなたの臨床研究の治療を中止すると判断をすることがあります。

- あなたから治療中止の申し出があった場合
- 痙攣発作が発現した場合
- 重度の皮膚障害が疑われ、担当医師が治療を継続できないと判断した場合
- 間質性肺疾患が疑われ、担当医師が治療を継続できないと判断した場合
- 上記以外の副作用、臨床症状の悪化等、その他の理由により、担当医師が中止したほうが良いと判断した場合

臨床研究の治療を中止した場合でも、その後の2次治療の調査を行いますので、ご協力をお願いします。

しかしながら、以下の理由などによりあなたの臨床研究の参加を途中で中止することがあります。

- あなたから臨床研究参加の辞退の申し出や同意の撤回があった場合



説明同意文書：転移性去勢抵抗性前立腺癌に対するアパルタミドの有効性・安全性の評価を目的とした多施設共同単群試験（GENESIS Study）

作成年月日：2022年6月15日 版数：1.2版

- 担当医師があなたを臨床研究に登録した後 29 日を経過しても初回投与を開始できないと判断した場合
- あなたが臨床研究に参加した後に、参加基準を満たしていないことが判明した場合
- この臨床研究自体が中止された場合
- その他の理由により、担当医師が中止したことが適当と判断した場合

なお、あなたが研究参加の同意を撤回した場合は、それまで収集されたデータの使用を拒否するかどうかを確認します。あなたがデータの使用を拒否した場合は、この臨床研究にはあなたのデータは使用しません。

## 15. この臨床研究に関わる費用や謝礼について

- 試験薬など医療費について  
この臨床研究で使用する試験薬は、通常の診療の範囲内で使用しますが、その有効性は確実なものではありません。この研究に参加していただくことで、来院回数が増えることにより、追加の費用が発生することがあります。
- 謝礼について  
この臨床研究に参加いただくことで、通常の診療よりも来院する回数が増え、それに伴う交通費や外食費などの患者さんの経済的な負担が増える場合がありますが、謝礼や負担軽減費はありません。

## 16. 試料等の保管及び廃棄の方法

この臨床研究に関連するあなたの研究データは、jRCTへ結果を公表してから5年間、または各実施医療機関の取り決めた期間のいずれか長い期間保管されます。その後はあなたを識別する情報（カルテ番号や氏名など）を特定できない状態にして破棄されます。カルテから抽出された診療データ等はシュレッダーにかけたり、ファイルを削除したり、完全に廃棄します。

また、あなたがこの臨床研究に関する同意を撤回された際も、撤回までに得られた情報については臨床研究の情報として利用させていただきます。利用を望まない場合には、これらの情報の使用を拒否することができますので、申し出てください。情報の利用を望まない場合には、同意を撤回された時点で本研究に関わる情報について復元不可能な状態で破棄いたします。ただし、同意を撤回された時点で、すでに論文公表等に用いた情報に関しては、破棄できない場合があります。

## 17. カルテなどの閲覧と個人情報保護について

- カルテなどの閲覧について  
あなたの人権が守られながら、きちんとこの臨床研究が行われているかを確認するた

説明同意書：転移性去勢抵抗性前立腺癌に対するアバルタミドの有効性・安全性の評価を目的とした多施設共同単群試験（GENESIS Study）

作成年月日：2022年6月15日 版数：1.2版

めに、この臨床研究の関係者（モニタリング担当者、認定臨床研究審査委員会委員、厚生労働省の関係者など）があなたのカルテなどの医療記録を直接閲覧することがあります。これらの関係者には、個人の秘密を漏らしてはならないという守秘義務が法律で課せられており、あなたのプライバシーを慎重に取扱います。同意書に署名されることによって臨床研究の関係者がカルテの閲覧することを認めたこととなります。

#### ● 個人情報保護について

臨床研究では、あなたの氏名などの個人情報は全てコード番号で管理されます（これを匿名化（とくめいか）といいます）。この研究は多施設共同研究であるため、臨床研究に関する情報は、神戸大学医学部附属病院へ送付されますが、その際にはあなたを特定できない状態で送付されます。そのため、あなたから得られたデータは、解析や学会・論文で報告される場合や、jRCT で公開された場合にも、あなたのお名前などプライバシーに関わる情報は一切使用されず、あなたが特定されることはありません。

また、あなたがあなたの個人情報が適切に利用されていないと感じたときなどには、個人情報の開示や、訂正、利用の停止を求めることができます。

### 18. 臨床研究に関する情報公開について（研究計画書等の開示について）

この臨床研究の研究計画や関係する資料をお知りになりたい場合は、他の患者さんの個人情報や研究全体に支障となる事項以外はお知らせすることができます。ご希望がございましたら「23. 臨床研究の問い合わせ窓口」に遠慮なくお申し出ください。また、この臨床研究の概要は jRCT (<https://jrct.niph.go.jp/>) に登録され、研究結果は臨床研究終了後に公開されますので、ご参照ください。

### 19. 研究データの取扱いについて

この臨床研究で得られたすべてのデータはこの臨床研究を実施し、結果を解析する目的にのみ利用し、それ以外の目的では利用しません。この臨床研究のデータは個人情報の一部を削除したうえで、神戸大学医学部附属病院に提出され結果の解釈に利用されます。ただし、この臨床研究のデータは将来に計画される同じ病気を対象とした研究に利用されることがありますが、その場合は個別の説明を行うことはありません。ただし、新たな研究が計画された時点で、神戸大学医学部附属病院やホームページで詳細が公表され、その時点でデータの利用を拒否していただくことが可能です。現時点で予定されている研究はありません。

### 20. 知的財産権の帰属について

この臨床研究により何らかの新たな知見が得られることがあります。その際に生じる特許権等の知的財産権は、神戸大学医学部附属病院に帰属し、あなたには帰属されません。



説明同意文書：転移性去勢抵抗性前立腺癌に対するアパルタミドの有効性・安全性の評価を目的とした多施設共同単群試験（GENESIS Study）

作成年月日：2022年6月15日 版数：1.2版

## 21. 当該臨床研究に係る資金源、利益相反について

### ● 資金源

この臨床研究は、医薬品アーリーダ®（一般名：アパルタミド）を製造販売するヤンセンファーマ株式会社と神戸大学との契約に基づき、ヤンセンファーマ株式会社より資金の提供を受けて実施されます。しかし、ヤンセンファーマ株式会社は研究の実施、結果の解析、解釈、論文作成等には一切関与しません。この臨床研究は医学的な視点から行われ、特定の企業・団体の利益や便宜をはかるものではありません。

### ● 利益相反

臨床研究における、利益相反とは「主に経済的な利害関係によって公正かつ適正な判断が歪められてしまうこと、または、歪められているのではないかと疑われかねない事態」のことを指します。具体的には、製薬企業や医療機器メーカーから研究者へ提供される謝金や研究費、株式、サービス、知的所有権等がこれに当たります。このような経済的活動が、臨床研究の結果を特定の企業や個人にとって有利な方向に歪曲させる可能性を判断する必要があり、そのために利害関係を管理することが定められています。

この臨床研究では、研究に使用する医薬品アーリーダ®（一般名：アパルタミド）を製造販売するヤンセンファーマ株式会社から年間合計 100 万円以上の個人的利益を受けている者が研究に従事しています。一方、医薬品アーリーダ®（一般名：アパルタミド）を共同販売する日本新薬株式会社と利益相反関係がある者は研究に従事していません。この臨床研究における利益相反管理は研究代表医師が利益相反の管理基準を定め、各実施医療機関の研究責任医師がその管理基準に基づき管理計画を立てて管理します。これらの管理基準および管理計画については認定臨床研究審査委員会の審査を受けています。詳細をお知りになりたい場合は、担当医師までお問い合わせください。

## 22. あなたに守っていただきたいこと

この臨床研究に参加いただく場合、患者さんの安全性確保のためや臨床研究で得られる情報をより正確に把握するために、以下に示した事項を守ってください。

- ◆ **決められた受診日には必ず来院してください。**  
やむを得ず来院できない場合は、事前に担当医師にご連絡ください。
- ◆ **お薬は指示された通り服用してください。**  
試験薬を誤って多く服用した場合は担当医師に相談してください。  
症状が和らいでも試験薬の服用は継続してください。
- ◆ **次の薬剤は併用しないでください。**  
試験薬の評価に影響する、抗腫瘍効果を目的とした他の抗がん剤。ニルマトレルビル錠/リトナビル錠パック。
- ◆ **試験薬により痙攣発作があらわれることがあります。**  
試験期間中は自動車の運転等危険を伴う機械を操作する際には注意してください。

説明同意文書：転移性去勢抵抗性前立腺癌に対するアパルタミドの有効性・安全性の評価を目的とした多施設共同単群試験（GENESIS Study）

作成年月日：2022年6月15日 版数：1.2版

痙攣を起こしやすい薬剤（アミノフィリン/テオフィリン、非定型抗精神病薬、プロピオン、炭酸リチウム、メペリジン、ペチジン塩酸塩、フェノチアジン系抗精神病薬、抗うつ薬）を服用する場合は痙攣の発現には注意してください。

痙攣発作が起こった場合は速やかに担当医師へご連絡頂くようお願いいたします。

◆ **試験薬により骨折が起こることがあります。**

また、前立腺癌では骨転移や治療の影響により、骨折リスクが高くなっている場合があります。日常生活では、重い荷物を持ったり、転倒しないように気をつけてください。

骨折を疑うようなことがおこった場合は速やかに担当医師へご連絡頂くようお願いいたします。

◆ **当院の他の診療科や他の病院にかかっている方はお知らせください。**

また、臨床研究参加中に新たに他の病院を受診される場合は、この臨床研究に参加されていることをお伝えください。また、研究に関して必要時には受診された病院にあなたが本臨床研究に参加されていることをお知らせしたり、あなたが他院や当院の他の診療科を受診された際の診療情報を調査させていただくことがありますので、ご了承ください。

◆ **普段内服している薬がある場合は、参加される前に担当医師にお知らせください。**

現在、服用している薬剤は、飲み合わせによって思わぬ副作用があらわれることがありますので、必ず担当医師にお伝えください。

◆ **いつもと体調が違うときはご連絡ください。**

身体に何らかの異常を感じた時は担当医師ご連絡ください。

## 23. 臨床研究の問い合わせ窓口

この臨床研究に関する問い合わせ窓口は以下となります。研究全般に関することや心配なこと、および苦情は研究事務局代表、または神戸大学医学部附属病院 患者相談窓口までお問い合わせください。また、あなたの体調や治療に関するご相談は、この臨床研究の各実施医療機関（あなたの受診されている病院）までお問い合わせください。

● **研究全般に関するお問い合わせ**

・研究事務局代表：三宅 秀明

所属：浜松医科大学医学部附属病院 泌尿器科 職名：教授

連絡先：(053) 435-2306 平日 10:00-17:15（土日祝日、年末年始はのぞく）

E-mail：hmiyake@hama-med.ac.jp

・神戸大学医学部附属病院 患者相談窓口

〒650-0017 神戸市中央区楠町7丁目5-2

外来診療棟1階 正面玄関の左

外来診療棟3階 臨床研究推進センター 患者相談窓口

受付時間：8:30-17:00（土日祝日、年末年始はのぞく）

説明同意文書：転移性去勢抵抗性前立腺癌に対するアバルタミドの有効性・安全性の評価を目的とした多施設共同単群試験（GENESIS Study）

作成年月日：2022年6月15日 版数：1.2版

連絡先：(078) 382-6667

E-mail：soudanct@med.kobe-u.ac.jp

● あなたの受診されている病院の窓口

※各実施医療機関の担当者へ：患者さんへ説明文書を手渡す場合には各実施医療機関の情報をご記載ください。（この文章は削除してください）

・ 研究責任医師：

所属： ○○ 病院 ▲ ▲ 科 職名：

連絡先：( ) - (内線 ) 平日 8:30-17:15

E-mail： @

※各実施医療機関の担当者へ：病院全体としての窓口がある場合は以下もご記載ください。（この文章は削除してください）

・ ○○ 病院 患者相談窓口

〒 - 住所：

受付時間：8：30-17：00 （土日祝日、年末年始はのぞく）

● 認定臨床研究審査委員会についての苦情及び問い合わせ窓口

神戸大学臨床研究審査委員会

電話番号：078-382-6669（平日 8:30-17:15）

電子メール：cerb@med.kobe-u.ac.jp

## 24. 改訂履歴

| 版数      | 作成日             | 理由                    |
|---------|-----------------|-----------------------|
| 第 1.0 版 | 2022 年 3 月 11 日 | 新規作成                  |
| 第 1.1 版 | 2022 年 5 月 23 日 | CRB の指摘事項に基づく修正。記載整備。 |
| 第 1.2 版 | 2022 年 6 月 15 日 | CRB の指摘事項に基づく修正。      |

説明同意書：転移性去勢抵抗性前立腺癌に対するアパルタミドの有効性・安全性の評価を目的とした多施設共同単群試験（GENESIS Study）  
作成年月日：2022年6月15日 版数：1.2版

## 同意書

医師用

### 研究の名称：転移性去勢抵抗性前立腺癌に対するアパルタミドの有効性・安全性の評価を目的とした多施設共同単群試験

私は、上記の研究について以下の記載事項について医師から十分な説明を受け、考える機会を与えられ理解しましたので、自らの意思によりこの臨床研究に参加することに同意します。また、本同意にあたり、説明文書および同意書を受領しました。

- ・ はじめに
- ・ この臨床研究に関する新たな情報が得られた場合について
- ・ 臨床研究の実施について
- ・ 他の治療法について
- ・ 臨床研究への参加について
- ・ 臨床研究の中止について
- ・ この臨床研究の対象となる患者さんの病状と治療について
- ・ この臨床研究に関わる費用や謝礼について
- ・ この臨床研究の意義と目的
- ・ 試料等の保管及び廃棄の方法
- ・ この臨床研究の方法（治療内容）について
- ・ カルテなどの閲覧と個人情報保護について
- ・ スケジュールと実施事項について
- ・ 臨床研究に関する情報公開について（研究計画書等の開示について）
- ・ この臨床研究の実施医療機関と参加予定者数
- ・ 研究データの取扱いについて
- ・ 臨床研究終了後の対応について
- ・ 知的財産権の帰属について
- ・ 期待される利益と予想される不利益について
- ・ 当該臨床研究に係る資金源、利益相反について
- ・ この臨床研究中に、あなたの健康に被害が生じた場合について
- ・ あなたに守っていただきたいこと
- ・ 臨床研究の問い合わせ窓口

ご本人氏名（自署） \_\_\_\_\_

同意日 20\_\_年\_\_月\_\_日

〔立会人記載欄（該当する場合）〕

私は説明医師／協力者から患者様への説明に立ち会いました

立会人氏名（自署） \_\_\_\_\_（患者さんとの関係： \_\_\_\_\_）

立会日 20\_\_年\_\_月\_\_日

（立会の理由 \_\_\_\_\_）

説明者 研究責任医師(研究分担医師)名（自署） \_\_\_\_\_

説明日 20\_\_年\_\_月\_\_日

説明同意書：転移性去勢抵抗性前立腺癌に対するアパルタミドの有効性・安全性の評価を目的とした多施設共同単群試験（GENESIS Study）  
作成年月日：2022年6月15日 版数：1.2版

## 同意書

患者用

### 研究の名称：転移性去勢抵抗性前立腺癌に対するアパルタミドの有効性・安全性の評価を目的とした多施設共同単群試験

私は、上記の研究について以下の記載事項について医師から十分な説明を受け、考える機会を与えられ理解しましたので、自らの意思によりこの臨床研究に参加することに同意します。また、本同意にあたり、説明文書および同意書を受領しました。

- ・ はじめに
- ・ この臨床研究に関する新たな情報が得られた場合について
- ・ 臨床研究の実施について
- ・ 他の治療法について
- ・ 臨床研究への参加について
- ・ 臨床研究の中止について
- ・ この臨床研究の対象となる患者さんの病状と治療について
- ・ この臨床研究に関わる費用や謝礼について
- ・ この臨床研究の意義と目的
- ・ 試料等の保管及び廃棄の方法
- ・ この臨床研究の方法（治療内容）について
- ・ カルテなどの閲覧と個人情報保護について
- ・ スケジュールと実施事項について
- ・ 臨床研究に関する情報公開について（研究計画書等の開示について）
- ・ この臨床研究の実施医療機関と参加予定者数
- ・ 研究データの取扱いについて
- ・ 臨床研究終了後の対応について
- ・ 知的財産権の帰属について
- ・ 期待される利益と予想される不利益について
- ・ 当該臨床研究に係る資金源、利益相反について
- ・ この臨床研究中に、あなたの健康に被害が生じた場合について
- ・ あなたに守っていただきたいこと
- ・ 臨床研究の問い合わせ窓口

ご本人氏名（自署） \_\_\_\_\_

同意日 20\_\_年\_\_月\_\_日

〔立会人記載欄（該当する場合）〕

私は説明医師／協力者から患者様への説明に立ち会いました

立会人氏名（自署） \_\_\_\_\_（患者さんとの関係： \_\_\_\_\_）

立会日 20\_\_年\_\_月\_\_日

（立会の理由 \_\_\_\_\_）

説明者 研究責任医師(研究分担医師)名（自署） \_\_\_\_\_

説明日 20\_\_年\_\_月\_\_日

説明同意書：転移性去勢抵抗性前立腺癌に対するアパルタミドの有効性・安全性の評価を目的とした多施設共同単群試験（GENESIS Study）  
作成年月日：2022年6月15日 版数：1.2版

## 同意書

臨床研究推進センター用（C220001）

研究の名称：転移性去勢抵抗性前立腺癌に対するアパルタミドの有効性・安全性の評価を目的とした多施設共同単群試験

私は、上記の研究について以下の記載事項について医師から十分な説明を受け、考える機会を与えられ理解しましたので、自らの意思によりこの臨床研究に参加することに同意します。また、本同意にあたり、説明文書および同意書を受領しました。

- ・ はじめに
- ・ この臨床研究に関する新たな情報が得られた場合について
- ・ 臨床研究の実施について
- ・ 他の治療法について
- ・ 臨床研究への参加について
- ・ 臨床研究の中止について
- ・ この臨床研究の対象となる患者さんの病状と治療について
- ・ この臨床研究に関わる費用や謝礼について
- ・ この臨床研究の意義と目的
- ・ 試料等の保管及び廃棄の方法
- ・ この臨床研究の方法（治療内容）について
- ・ カルテなどの閲覧と個人情報保護について
- ・ スケジュールと実施事項について
- ・ 臨床研究に関する情報公開について（研究計画書等の開示について）
- ・ この臨床研究の実施医療機関と参加予定者数
- ・ 研究データの取扱いについて
- ・ 臨床研究終了後の対応について
- ・ 知的財産権の帰属について
- ・ 期待される利益と予想される不利益について
- ・ 当該臨床研究に係る資金源、利益相反について
- ・ この臨床研究中に、あなたの健康に被害が生じた場合について
- ・ あなたに守っていただきたいこと
- ・ 臨床研究の問い合わせ窓口

ご本人氏名（自署） \_\_\_\_\_

同意日 20\_\_年\_\_月\_\_日

〔立会人記載欄（該当する場合）〕

私は説明医師／協力者から患者様への説明に立ち会いました

立会人氏名（自署） \_\_\_\_\_（患者さんとの関係： \_\_\_\_\_）

立会日 20\_\_年\_\_月\_\_日

（立会の理由 \_\_\_\_\_）

説明者 研究責任医師(研究分担医師)名（自署） \_\_\_\_\_

説明日 20\_\_年\_\_月\_\_日



説明同意書：転移性去勢抵抗性前立腺癌に対するアパルタミドの有効性・安全性の評価を目的とした多施設共同単群試験（GENESIS Study）

作成年月日：2022年6月15日 版数：1.2版

## 同意撤回書

### 研究の名称：転移性去勢抵抗性前立腺癌に対するアパルタミドの有効性・安全性の評価を 目的とした多施設共同単群試験

私は、上記研究の臨床研究に参加するにあたり、担当医師から説明を受け、十分理解し同意しましたが、私の自由意思による参加の中止も自由であることから、この研究参加への同意を撤回したく、ここに同意撤回書を提出します。

これまでに提供した試料および情報の利用について

私は、上記の臨床研究の参加に同意した日からこの同意撤回書を提出するまでの間に提供したこの研究に関わる試料及び情報の利用について、

同意します       同意しません。

20 年 月 日

氏名（研究参加者本人または代諾者）（自署）

\_\_\_\_\_  
（代諾者の場合は、本人との関係）

\_\_\_\_\_



説明同意文書：転移性去勢抵抗性前立腺癌に対するアパルタミドの有効性・安全性の評価を目的とした多施設共同単群試験（GENESIS Study）

作成年月日：2022年6月15日 版数：1.2版

## 別紙 実施医療機関の一覧

| 実施医療機関               | 研究責任医師 | 職名  |
|----------------------|--------|-----|
| 神戸大学医学部附属病院 泌尿器科     | 中野 雄造  | 准教授 |
| 明石市立市民病院 泌尿器科        | 山中 邦人  | 部長  |
| 加古川中央市民病院 泌尿器科       | 岡 泰彦   | 部長  |
| 関西ろうさい病院 泌尿器科        | 田口 功   | 部長  |
| 神戸市立医療センター西市民病院 泌尿器科 | 中村 一郎  | 部長  |
| 三田市民病院 泌尿器科          | 曾我 英雄  | 部長  |
| 姫路赤十字病院 泌尿器科         | 原口 貴裕  | 部長  |
| 兵庫県立尼崎総合医療センター 泌尿器科  | 山田 裕二  | 部長  |
| 兵庫県立淡路医療センター 泌尿器科    | 吉行 一馬  | 部長  |
| 兵庫県立加古川医療センター 泌尿器科   | 田中 宏和  | 院長  |
| 北播磨総合医療センター 泌尿器科     | 田中 一志  | 部長  |
| 浜松医科大学医学部附属病院 泌尿器科   | 三宅 秀明  | 教授  |
| 聖隷三方原病院 泌尿器科         | 古瀬 洋   | 部長  |
| 浜松医療センター 泌尿器科        | 永田 仁夫  | 部長  |
| 磐田市立総合病院 泌尿器科        | 水野 卓爾  | 部長  |
| 中東遠総合医療センター 泌尿器科     | 松本 力哉  | 部長  |
| 広島大学病院 泌尿器科          | 日向 信之  | 教授  |
| 鳥取大学医学部附属病院 泌尿器科     | 武中 篤   | 教授  |
